# Supplementary material
Source: PubMed Central journal article supplement (PMC6222093)
Supplement: supp_RA118.003945_138116_1_supp_200569_pf08tt.pdf [file supp_RA118.003945_138116_1_supp_200569_pf08tt.pdf]

|                                     |                               |
|-------------------------------------|-------------------------------|
| Athaliana AT3G45140.1               | TPEPLKK <b>YRKEELET</b> LQGKN |
| Ahalleri Araha.47358s0001.1         | TPEPLKKYRKEELETLQGKN          |
| Bstricta Bostr.21132s0001.1         | TPEPLKQFRKKELETLQGKN          |
| Crubella Carubv10016666m            | TPKPLQQLRKKKELETLQGNN         |
| Cgrandiflora Cagra.0664s0086.1      | TPKPLQQLRKKKELETLQGNN         |
| BrapaFPsc Brara.B01571.1            | TPEPLKKLRKEELETLQGNN          |
| Klaxiflora Kalax.0400s0003.1        | TPEGLKEYREKELTLMRGFG          |
| Spolyrhiza Spipo28G0005500          | TPGGLVTLREKELDTLRGDG          |
| Vvinifera GSVIVT01025340001         | TPRGLKGMREKELASLRGNG          |
| Gmax Glyma.11G130300.1              | TPEGVKRLREEELEQLRGNG          |
| Mguttatus Migut.D00557.1            | TPTALERYREKELEILRGDG          |
| Mdomestica MDP0000300321            | TPSGLAKLREEELVTLRGNG          |
| Graimondii Gorai.009G071200.1       | TPSGLKRMKEELQALRGNG           |
| Tcacao Thecc1EG040491t1             | TPGGLKRLRTEELEALRGNG          |
| Spurpurea SapurV1A.2466s0010.1      | TPNGLKKLRGAELQTIIRGND         |
| Ptrichocarpa Potri.001G015400.1     | TPSGIRRLREEELVLLRGNG          |
| Csinensis orange1.1g002617m         | TPDGLKRYRAEELTILRGNG          |
| Cclementina Ciclev10014199m         | TPDGLKRYRAEELTILRGNG          |
| Acoerulea Aqcoe1G020300.1           | TPSGIKKLREKELENLRGNG          |
| Acomosus Aco015670.1                | TPPGLERLRKKELANMRGDG          |
| Cpapaya evm.model.supercontig_458.4 | TPEGLRRLRELELENLRGNG          |
| Ppersica Prupe.2G005500.1           | TPSGLKRLRELELENLRGNG          |
| Rcommunis 30152.m002449             | TPDGLKRLREELELENLRGNG         |
| Mesculenta Manes.07G002400.1        | TPDGLKRLREGELES LRGNG         |
|                                     | ** : * ** ::* .               |

SUPPLEMENTARY FIGURE 1. Alignment of proposed LOX2 eIF4E binding motif. The proposed binding site in *A. thaliana* is highlighted in red. The motif shows poor conservation in LOX2 homologs of flowering plants.

**A**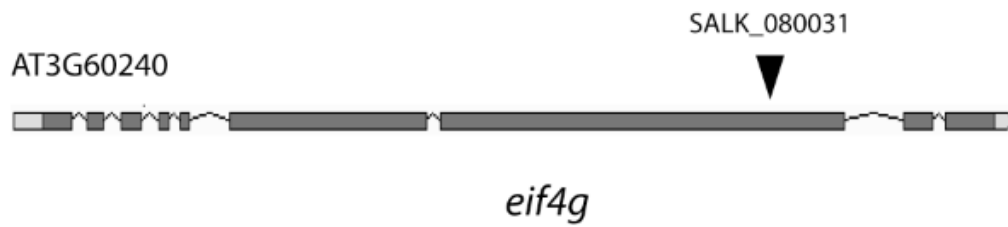**B**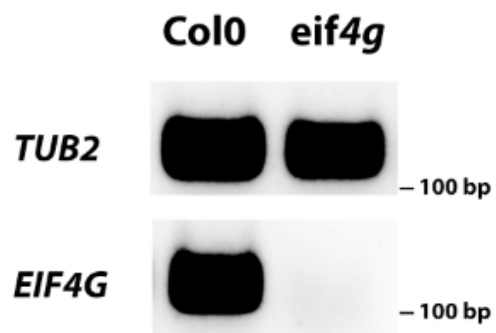

SUPPLEMENTARY FIGURE 2. The T-DNA line *eif4g*. (A) Location of the T-DNA insertion in the seventh exon of the *EIF4G* gene. (B) RT-PCR of *TUB2* and *EIF4G* in cDNA prepared from 7-day-old Col0 and *eif4g* seedlings indicates loss of full length *EIF4G* transcript.

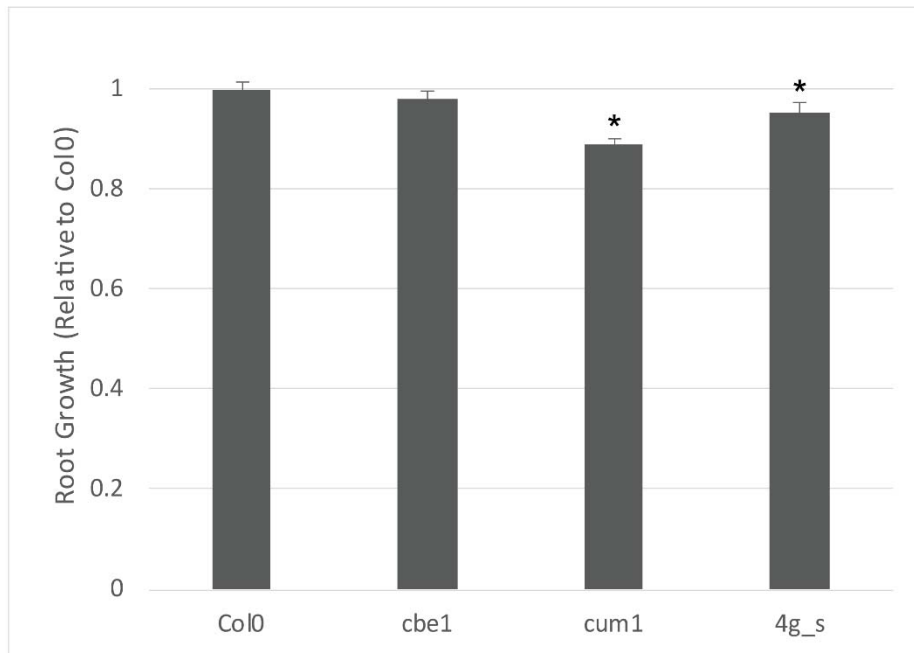

SUPPLEMENTARY FIGURE 3. Root growth of *A. thaliana* mutant lines relative to Col0 on vertically grown MS media plates with 1% sucrose for 12 days. Asterisks mark statistically significant differences from wild-type (Student's t-test, p value < 0.05, n=24).

**A**

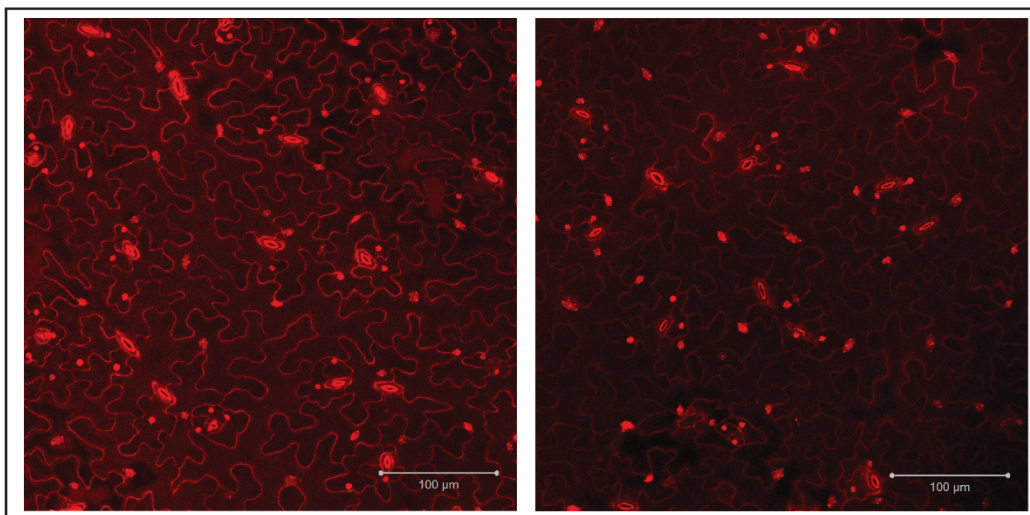

**Col0**

**B**

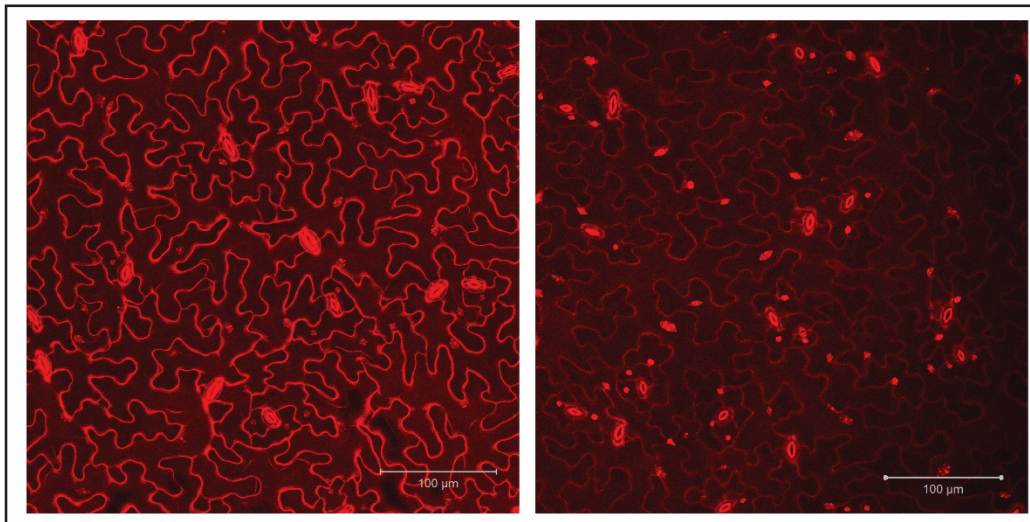

***cbe1***

SUPPLEMENTARY FIGURE 4. Confocal images of plant epidermal cells co-stained with propidium iodide (cell walls) and DAPI (nuclei) from leaves of 21 day old Col0 (A) and *cbe1* mutant (B) seedlings. Scale bar is 100  $\mu\text{m}$ .

SUPPLEMENTARY TABLE 2. Primers used in RT-PCR and qRT-PCR experiments.

| <b>Primer</b> | <b>Sequence</b>       |
|---------------|-----------------------|
| CYCB2.4 F     | AGGATACGAGGATTGGAGCA  |
| CYCB2.4 R     | CTTGTGATGCAAACCAACCA  |
| CDKB2.1 F     | TGGCTGCATATTTGCTGAAC  |
| CDKB2.1 R     | CCTGGCCACATTTCTTCATT  |
| CDC20.2 F     | AAATGGCTGAGCTCACTGGT  |
| CDC20.2 R     | ACCTCAGGGTCTCGTCTCCT  |
| ATK5 F        | GAAGTGAGCGACTTTCAAGGA |
| ATK5 R        | TCCTCTTTCTTTGCCAATGC  |
| PLE F         | TAGGAGCAGCAATGCATCAG  |
| PLE R         | CTGCAATGTCAAGCCCTCTT  |
| TPX2 F        | GCAAAAATGGTGGAGGAAGA  |
| TPX2 R        | CCCTTGTTGGACTTCTGAGG  |
| EIF4G F       | CAATGCCATCGATCTGAGAA  |
| EIF4G R       | ATTGAGGGTCCACGTGAAAG  |
| CBE1 F        | AGTCGAAGTTCTCCCATCCA  |
| CBE1 R        | GTCGGGATTTGCTTTTGTGT  |
